# Supplementary material
Source: publisher site journal article supplement (http://static.cambridge.org/content/id/urn:cambridge.org:id:article:S0033822219000705/resource/name/S0033822219000705supp002.docx)
Supplement: Supplementary file 1 [file S0033822219000705supp002.docx]

SUPPLEMENTAL APPENDIX 2

| Sample ID | Arch. phase | CI | Lab.code | Starting weight (mg) | Weight after pretreatment(mg) | Weight loss after acetic acid (%) | %C | pMC | δ13C  (‰VPDB, AMS)1 | 14C Age (BP) |
| --- | --- | --- | --- | --- | --- | --- | --- | --- | --- | --- |
| Aarupgaard, grave 3869 | I.1 | 6.0 | GrM-15076 | 6153 | 5978 | 3.0 | 0.09 | 72.87 ± 0.16 | -21.6 ± 0.3 | 2540 ± 20 |
|  |  |  | KIA-52346 | 2000 | 1176 | 0.5 | 0.21 | 73.66 ± 0.23 | -25.9 ± 0.4 | 2456 ± 25 |
|  |  |  | RICH-24152 | 3620 | 2300 | 15.5 | 0.20 | 73.22 ± 0.24 | -25.8 ± 0.1 | 2504 ± 26 |
| Aarupgaard, grave 3330 | I.1 | 6.8 | GrM-14594 | 5894 | 5761 | 2.0 | 0.10 | 72.96 ± 0.13 | -21.0 ± 0.1 | 2535 ± 20 |
|  |  |  | KIA-52824* | - | 1008 | - | 0.29 | 73.52 ± 0.24 | -21.5 ± 0.2 | 2471 ± 26 |
|  |  |  | KIA-51901 | 1522 | 761 | 0.2 | 0.28 | 73.23 ± 0.24 | -21.9 ± 0.3 | 2503 ± 27 |
| Aarupgaard, grave 51 | I.1 | 5.9 | GrM-15072 | 4789 | 4632 | 3.0 | 0.11 | 73.77 ± 0.26 | -30.3 ± 0.4 | 2445 ± 20 |
|  |  |  | KIA-52339 | 2000 | 1086 | 0.6 | 0.38 | 73.73 ± 0.24 | -26.8 ± 0.3 | 2448 ± 26 |
| Aarupgaard, grave 1076 | I.2b | 6.4 | GrM-14592 | 6862 | 6700 | 2.0 | 0.08 | 75.47 ± 0.14 | -27.8 ± 0.2 | 2260 ± 20 |
|  |  |  | KIA-52822* | - | 1004 | - | 0.18 | 76.05 ± 0.28 | -25.3 ± 0.3 | 2199 ± 29 |
|  |  |  | RICH-25340 | 3100 | 1700 | 15.0 | 0.12 | 76.06 ± 0.26 | -25.5 ± 0.1 | 2198 ± 27 |
| Aarupgaard, grave 1847 | I.2b | 6.1 | GrM-15075 | 3954 | 3775 | 3.0 | 0.08 | 75.53 ± 0.20 | -25.4 ± 0.2 | 2255 ± 20 |
|  |  |  | KIA-52342 | 2000 | 1100 | 0.7 | 0.28 | 75.78 ± 0.24 | -28.9 ± 0.3 | 2228 ± 25 |
| Aarupgaard, grave 1791 | I.2b | 5.7 | GrM-15074 | 3994 | 3854 | 4.0 | 0.07 | 75.78 ± 0.26 | -30.0 ± 0.5 | 2230 ± 25 |
|  |  |  | KIA-52341 | 2000 | 1021 | 0.6 | 0.29 | 76.35 ± 0.23 | -29.6 ± 0.3 | 2167 ± 25 |
| Aarupgaard, grave 83 | I.1 | 6.0 | GrM-15078 | 6682 | 6561 | 2.0 | 0.06 | 73.42 ± 0.30 | -28.1 ± 0.5 | 2485 ± 30 |
|  |  |  | KIA-52825* | - | 1011 | - | 0.17 | 74.09 ± 0.25 | -20.7 ± 0.4 | 2409 ± 27 |
| Aarupgaard, grave 1186 | I.1 | 5.8 | GrM-14597 | 6926 | 6747 | 3.0 | 0.12 | 73.58 ± 0.13 | -24.7 ± 0.2 | 2465 ± 20 |
|  |  |  | KIA-53096* | - | 1051 | - | 0.27 | 74.10 ± 0.18 | -24.1 ± 0.2 | 2408 ± 20 |
| Aarupgaard, grave 280 | I.1 | 6.2 | GrM-14588 | 8674 | 8553 | 1.0 | 0.08 | 74.12 ± 0.14 | -25.1 ± 0.2 | 2405 ± 20 |
|  |  |  | KIA-52820* | - | 1004 | - | 0.27 | 74.16 ± 0.21 | -22.7 ± 0.2 | 2402 ± 22 |
| Aarupgaard, grave 81 | I.1 | 5.9 | GrM-14589 | 6830 | 6664 | 2.0 | 0.06 | 73.93 ± 0.20 | -27.5 ± 1.0 | 2425 ± 30 |
|  |  |  | KIA-52819* | - | 1008 | - | 0.19 | 74.37 ± 0.20 | -23.0 ± 0.3 | 2379 ± 22 |
| Aarupgaard, grave 230 | I.2a | 5.4 | GrM-14704 | 6279 | 6013 | 4.0 | 0.07 | 72.83 ± 0.12 | -21.7 ± 0.3 | 2546 ± 19 |
|  |  |  | KIA-52826* | - | 1003 | - | 0.19 | 74.53 ± 0.23 | -20.9 ± 0.1 | 2362 ± 25 |
| Aarupgaard, grave 766 | I.2a | 5.5 | GrM-14589 | 4545 | 4328 | 5.0 | 0.16 | 75.24 ± 0.14 | -26.4 ± 0.2 | 2285 ± 20 |
|  |  |  | KIA-52821* | - | 1009 | - | 0.39 | 75.55 ± 0.21 | -25.2 ± 1.0 | 2252 ± 23 |
| Aarupgaard, grave 681 | I.2b | 6.0 | GrM-14705 | 8701 | 8548 | 2.0 | 0.08 | 75.01 ± 0.12 | -22.3 ± 0.2 | 2310 ± 19 |
|  |  |  | KIA-53094* | - | 1016 | - | 0.24 | 75.05 ± 0.19 | -22.5 ± 0.2 | 2305 ± 20 |
| Aarupgaard, grave 1001 | I.2b | 6.2 | GrM-14599 | 8373 | 8209 | 2.0 | 0.08 | 75.71 ± 0.14 | -23.0 ± 0.1 | 2235 ± 20 |
|  |  |  | KIA-53095* | - | 1069 | - | 0.22 | 75.54 ± 0.19 | -20.1 ± 0.2 | 2253 ± 21 |
| Aarupgaard, grave 382 | I.2b | 7.3 | GrM-14596 | 8936 | 8731 | 2.0 | 0.08 | 75.29 ± 0.14 | -24.8 ± 0.2 | 2280 ± 20 |
|  |  |  | KIA-52827* | - | 1010 | - | 0.27 | 75.77 ± 0.24 | -22.5 ± 0.3 | 2229 ± 25 |
| Aarupgaard, grave 1363 | I.2b | 6.5 | GrM-14602 | 8900 | 8750 | 2.0 | 0.07 | 75.79 ± 0.14 | -30.3 ± 0.2 | 2225 ± 20 |
|  |  |  | KIA-52828* | - | 1003 | - | 0.17 | 76.09 ± 0.23 | -27.9 ± 0.4 | 2195 ± 24 |
| Aarupgaard, grave 2262 | II.2 | 6.5 | GrM-14593 | 10391 | 9887 | 5.0 | 0.07 | 75.53 ± 0.16 | -20.9 ± 0.4 | 2255 ± 25 |
|  |  |  | KIA-52823* | - | 1009 | - | 0.24 | 75.92 ± 0.26 | -19.0 ± 0.2 | 2214 ± 28 |
| Aarre, A117, x762 | I.1 | 6.0 | GrM-14604 | 8019 | 7765 | 3.0 | 0.10 | 73.75 ± 0.13 | -25.7 ± 0.1 | 2445 ± 20 |
|  |  |  | KIA-53098* | - | 1051 | - | 0.28 | 74.03 ± 0.19 | -22.1 ± 0.2 | 2416 ± 20 |
| Aarre, A281, x484 | I.2 | 6.2 | GrM-14707 | 4848 | 4715 | 3.0 | 0.10 | 74.91 ± 0.13 | -28.0 ± 0.4 | 2320 ± 20 |
|  |  |  | KIA-53100* | - | 1007 | - | 0.11 | 75.37 ± 0.19 | -23.5 ± 0.2 | 2271 ± 20 |
| Aarre, A394, x785 | I.1 - I.2a | 6.3 | GrM-14708 | 7435 | 7272 | 2.0 | 0.10 | 73.57 ± 0.11 | -21.2 ± 0.2 | 2465 ± 18 |
|  |  |  | KIA-53099* | - | 1018 | - | 0.14 | 73.97 ± 0.19 | -22.7 ± 0.2 | 2422 ± 20 |

* Apatite pretreated by CIO.

1 Measured by AMS.
